# Supplementary material
Source: PubMed Central journal article supplement (PMC3017448)

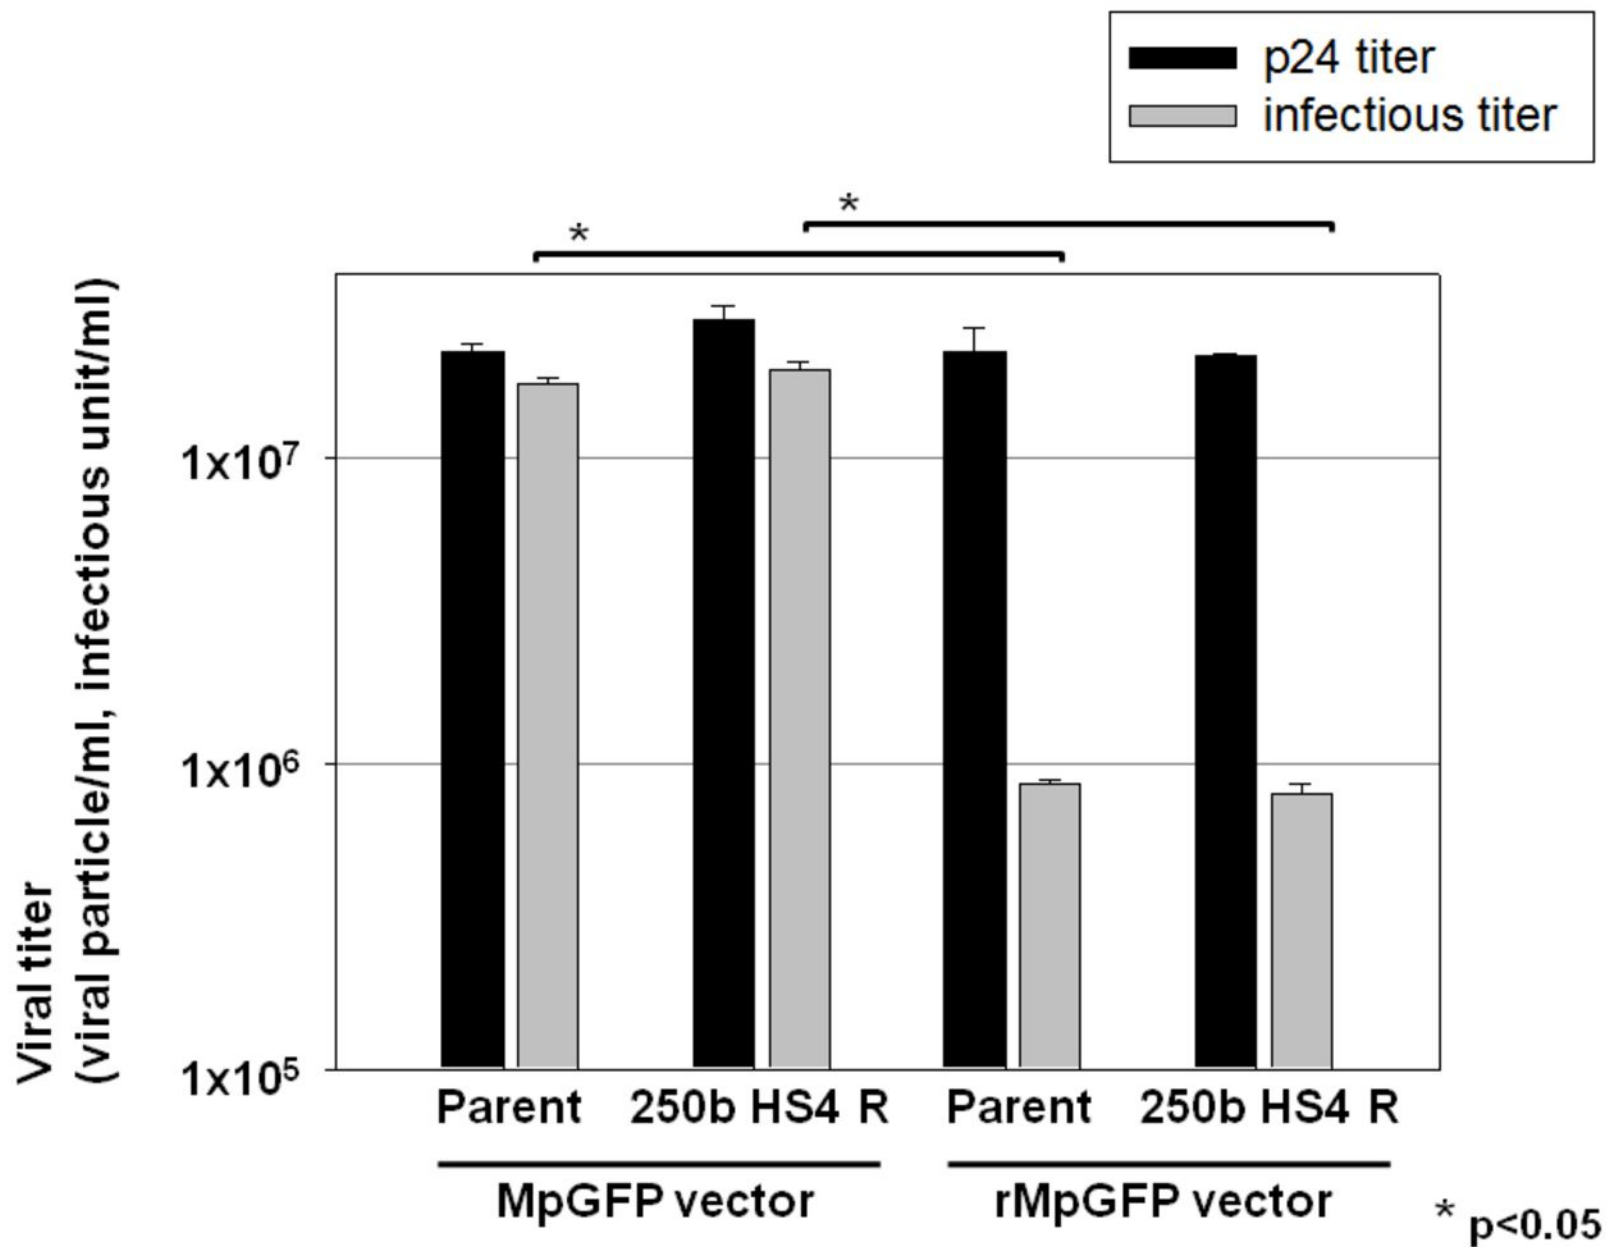

Supplement: mt2010218x1.pdf [file mt2010218x1.pdf]

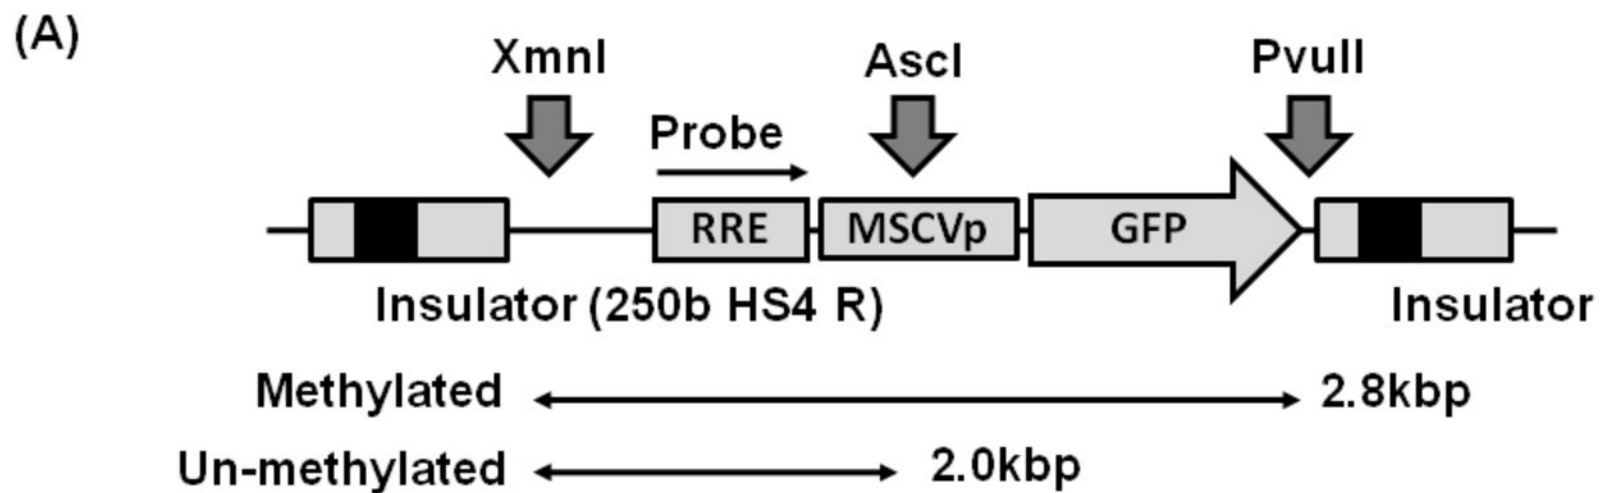

(B)

|  | MpGFP | 250b HS4 R | NC | Unmethyl. | Methyl. |
|--|-------|------------|----|-----------|---------|
|--|-------|------------|----|-----------|---------|

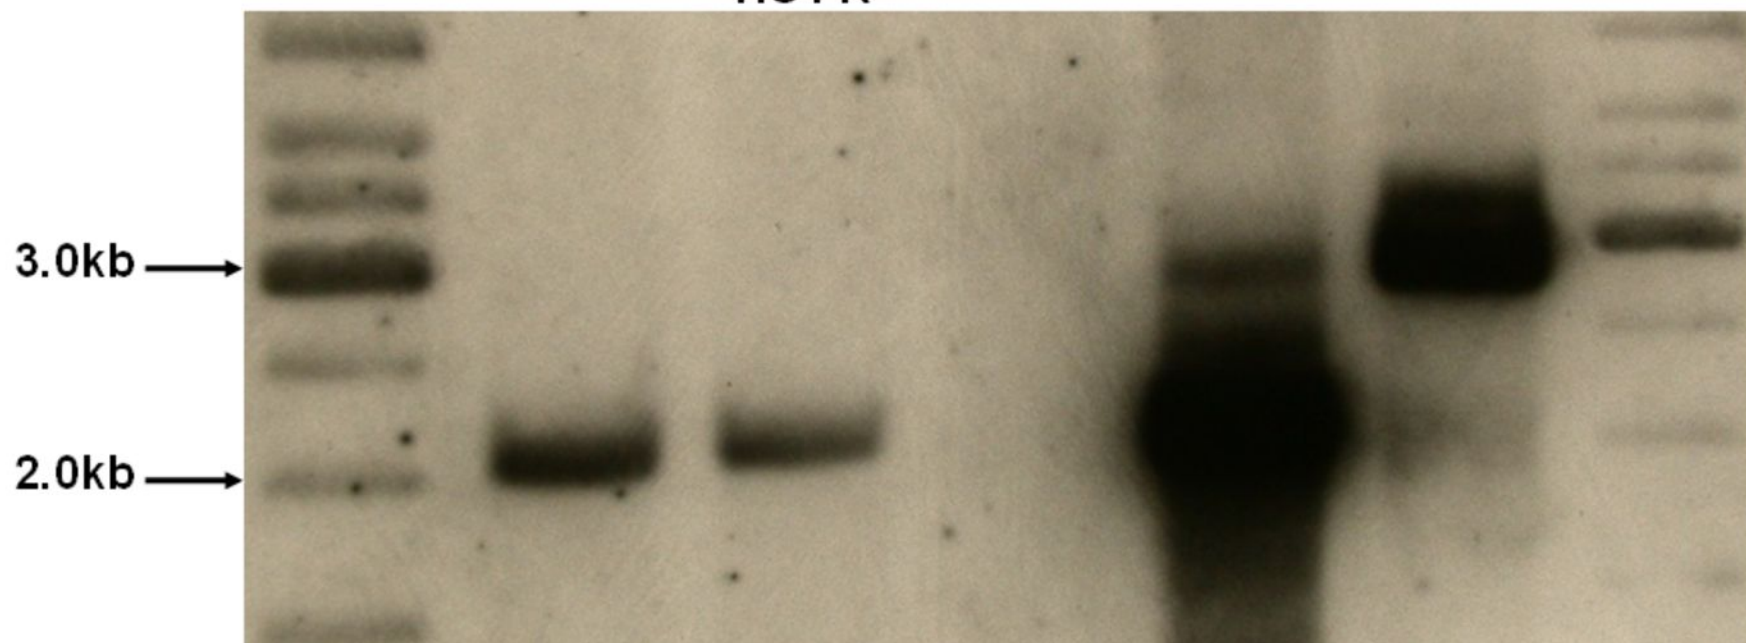

Supplement: mt2010218x2.pdf [file mt2010218x2.pdf]

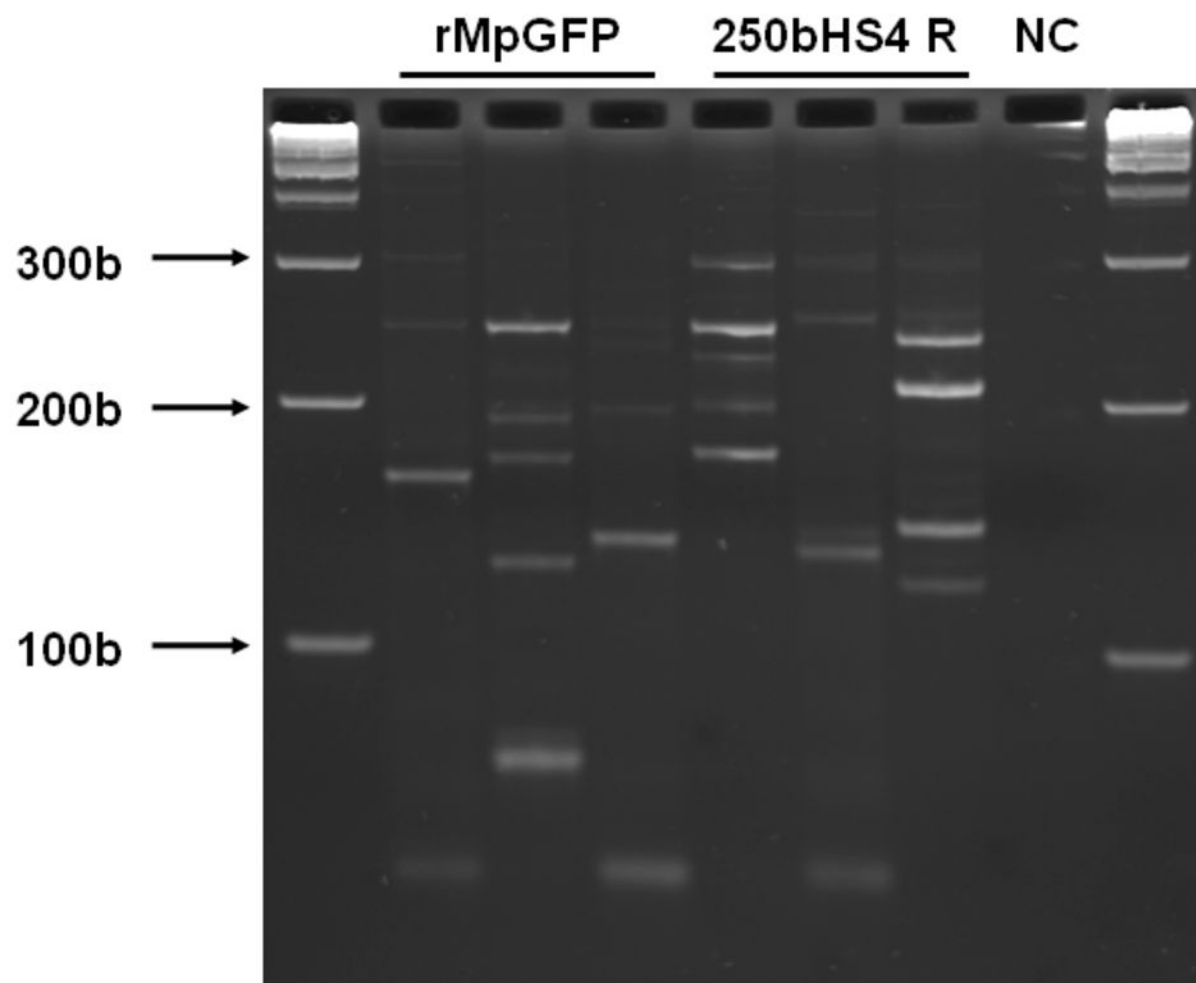

Supplement: mt2010218x3.pdf [file mt2010218x3.pdf]
